# Supplementary material for: Predictions of potential geographical distribution of Diaphorina citri (Kuwayama) in China under climate change scenarios
Source: PubMed Central journal article supplement (PMC7280263; doi:10.1038/s41598-020-66274-5), 2020-06-08
Supplement: 41598_2020_66274_MOESM1_ESM.pdf [file 41598_2020_66274_MOESM1_ESM.pdf]

**Predictions of potential geographical distribution of *Diaphorina citri* (Kuwayama) in China under climate change scenarios**

Rulin Wang<sup>1,2</sup>, Hua Yang<sup>3</sup>, Mingtian Wang<sup>4</sup>, Zhe Zhang<sup>1</sup>, Tingting Huang<sup>2</sup>, Gang Wen<sup>5</sup>, Qing Li<sup>1,\*</sup>

---

<sup>1</sup>College of Agronomy, Sichuan Agricultural University, Chengdu, Sichuan, 611130, China. <sup>2</sup>Sichuan Provincial Rural Economic Information Center, Chengdu, Sichuan, 610072, China. <sup>3</sup>Key Laboratory of Ecological Forestry Engineering of Sichuan Province/College of Forestry, Sichuan Agricultural University, Chengdu 611130, China. <sup>4</sup>Sichuan Meteorological Observatory, Chengdu, Sichuan, 610072, China. <sup>5</sup> *Bureau of Agriculture of Yibin City*, Yibin, Sichuan, 644000, China. Correspondence and requests for materials should be addressed to Q.L. (email: liq8633@163.com)

**S1 Table. List of environmental variables used for this study, with type and measurement unit**

| <b>Code</b> | <b>Environmental variables</b>                            | <b>Unit</b> |
|-------------|-----------------------------------------------------------|-------------|
| bio1        | Annual Mean Temperature                                   | °C          |
| bio2        | Mean Diurnal Range (Mean of monthly (max temp - min temp) | °C          |
| bio3        | Isothermality (bio2/bio7) (* 100)                         | -           |
| bio4        | Temperature Seasonality (standard deviation *100)         | -           |
| bio5        | Max Temperature of Warmest Month                          | °C          |
| bio6        | Min Temperature of Coldest Month                          | °C          |
| bio7        | Temperature Annual Range (bio5-bio6)                      | °C          |
| bio8        | Mean Temperature of Wettest Quarter                       | °C          |
| bio9        | Mean Temperature of Driest Quarter                        | °C          |
| bio10       | Mean Temperature of Warmest Quarter                       | °C          |
| bio11       | Mean Temperature of Coldest Quarter                       | °C          |
| bio12       | Annual Precipitation                                      | mm          |
| bio13       | Precipitation of Wettest Month                            | mm          |
| bio14       | Precipitation of Driest Month                             | mm          |
| bio15       | Precipitation Seasonality (Coefficient of Variation)      | mm          |
| bio16       | Precipitation of Wettest Quarter                          | mm          |
| bio17       | Precipitation of Driest Quarter                           | mm          |
| bio18       | Precipitation of Warmest Quarter                          | mm          |
| bio19       | Precipitation of Coldest Quarter                          | mm          |
