# Supplementary material for: Predictions of potential geographical distribution of Diaphorina citri (Kuwayama) in China under climate change scenarios
Source: PubMed Central journal article supplement (PMC7280263; doi:10.1038/s41598-020-66274-5), 2020-06-08
Supplement: 41598_2020_66274_MOESM2_ESM.pdf [file 41598_2020_66274_MOESM2_ESM.pdf]

**Predictions of potential geographical distribution of *Diaphorina citri* (Kuwayama) in China under climate change scenarios**

Rulin Wang<sup>1,2</sup>, Hua Yang<sup>3</sup>, Mingtian Wang<sup>4</sup>, Zhe Zhang<sup>1</sup>, Tingting Huang<sup>2</sup>, Gang Wen<sup>5</sup>, Qing Li<sup>1,\*</sup>

---

<sup>1</sup>College of Agronomy, Sichuan Agricultural University, Chengdu, Sichuan, 611130, China. <sup>2</sup>Sichuan Provincial Rural Economic Information Center, Chengdu, Sichuan, 610072, China. <sup>3</sup>Key Laboratory of Ecological Forestry Engineering of Sichuan Province/College of Forestry, Sichuan Agricultural University, Chengdu 611130, China. <sup>4</sup>Sichuan Meteorological Observatory, Chengdu, Sichuan, 610072, China. <sup>5</sup> *Bureau of Agriculture of Yibin City*, Yibin, Sichuan, 644000, China. Correspondence and requests for materials should be addressed to Q.L. (email: liq8633@163.com)

**S2 Table. Pairwise Pearson's correlation coefficients of environmental variables.**

|              | alt           | bio1   | bio2   | bio3  | bio4   | bio5   | bio6   | bio7   | bio8   | bio9   | bio10  | bio11  | bio12  | bio13  | bio14  | bio15 | bio16  | bio17  | bio18 |
|--------------|---------------|--------|--------|-------|--------|--------|--------|--------|--------|--------|--------|--------|--------|--------|--------|-------|--------|--------|-------|
| <b>bio1</b>  | 0.1           |        |        |       |        |        |        |        |        |        |        |        |        |        |        |       |        |        |       |
| <b>bio2</b>  | 0.15          | 0.37** |        |       |        |        |        |        |        |        |        |        |        |        |        |       |        |        |       |
| <b>bio3</b>  | -0.05         | 0.22*  | 0.24** |       |        |        |        |        |        |        |        |        |        |        |        |       |        |        |       |
| <b>bio4</b>  | 0.5**         | 0.62** | 0.41** | 0.13  |        |        |        |        |        |        |        |        |        |        |        |       |        |        |       |
| <b>bio5</b>  | 0.28**        | 0.57** | 0.44** | 0.13  | 0.57** |        |        |        |        |        |        |        |        |        |        |       |        |        |       |
| <b>bio6</b>  | -0.11         | 0.44** | 0.15   | 0.06  | 0.4**  | 0.5**  |        |        |        |        |        |        |        |        |        |       |        |        |       |
| <b>bio7</b>  | 0.25**        | 0.81** | 0.36** | 0.14  | 0.68** | 0.61** | 0.46** |        |        |        |        |        |        |        |        |       |        |        |       |
| <b>bio8</b>  | 0.15          | 0.91** | 0.22*  | -0.08 | 0.49** | 0.64** | 0.41** | 0.71** |        |        |        |        |        |        |        |       |        |        |       |
| <b>bio9</b>  | -0.03         | 0.62** | 0.21*  | 0.02  | 0.59** | 0.41** | 0.72** | 0.58** | 0.55** |        |        |        |        |        |        |       |        |        |       |
| <b>bio10</b> | 0.3**         | 0.59** | 0.53** | 0.16  | 0.69** | 0.52** | 0.22** | 0.58** | 0.53** | 0.46** |        |        |        |        |        |       |        |        |       |
| <b>bio11</b> | -0.07         | 0.56** | 0.2*   | 0.01  | 0.49** | 0.36** | 0.75** | 0.55** | 0.54** | 0.8**  | 0.44** |        |        |        |        |       |        |        |       |
| <b>bio12</b> | 0.33**        | 0.53** | 0.37** | 0.13  | 0.77** | 0.48** | 0.24** | 0.59** | 0.6**  | 0.49** | 0.59** | 0.33** |        |        |        |       |        |        |       |
| <b>bio13</b> | 0.13          | 0.3**  | 0.17*  | -0.07 | 0.59** | 0.3**  | 0.39** | 0.29** | 0.29** | 0.49** | 0.41** | 0.57** | 0.38** |        |        |       |        |        |       |
| <b>bio14</b> | -0.11         | 0.78** | 0.31** | 0.05  | 0.36** | 0.53** | 0.55** | 0.7**  | 0.81** | 0.72** | 0.48** | 0.59** | 0.37** | 0.12   |        |       |        |        |       |
| <b>bio15</b> | -0.01         | 0.1    | 0.73** | 0.14  | 0.19*  | 0.31** | 0.14   | 0.06   | 0.05   | 0.09   | 0.39** | 0.07   | 0.21*  | 0.14   | 0.18*  |       |        |        |       |
| <b>bio16</b> | 0.71**        | 0.28** | 0.17*  | -0.08 | 0.7**  | 0.39** | 0.05   | 0.43** | 0.44** | 0.23*  | 0.45** | 0.1    | 0.51** | 0.33** | 0.1    | 0.02  |        |        |       |
| <b>bio17</b> | 0.38**        | 0.61** | 0.3**  | 0.01  | 0.72** | 0.57** | 0.6**  | 0.68** | 0.6**  | 0.79** | 0.59** | 0.62** | 0.62** | 0.4**  | 0.69** | 0.14  | 0.55** |        |       |
| <b>bio18</b> | <b>0.92**</b> | 0.22*  | 0.23** | -0.01 | 0.62** | 0.39** | 0.02   | 0.35** | 0.31** | 0.11   | 0.42** | 0.08   | 0.42** | 0.27** | 0      | 0.07  | 0.74** | 0.5**  |       |
| <b>bio19</b> | 0.33**        | 0.66** | 0.32** | 0.03  | 0.75** | 0.56** | 0.49** | 0.73** | 0.59** | 0.71** | 0.6**  | 0.69** | 0.63** | 0.4**  | 0.66** | 0.1   | 0.51** | 0.79** | .44** |

**Notes:**

bio1: Annual Mean Temperature; bio2: Mean Diurnal Range; bio3: Isothermality; bio4: Temperature Seasonality; bio5: Max Temperature of Warmest Month; bio6: Min Temperature of Coldest Month; bio7: Temperature Annual Range; bio8: Mean Temperature of Wettest Quarter; bio9: Mean Temperature of Driest Quarter; bio10: Mean Temperature of Warmest Quarter; bio11: Mean Temperature of Coldest Quarter; bio12: Annual Precipitation; bio13: Precipitation of Wettest Month; bio14:

Precipitation of Driest Month; bio15: Precipitation Seasonality; bio16: Precipitation of Wettest Quarter; bio17: Precipitation of Driest Quarter; bio18: Precipitation of Warmest Quarter; bio19: Precipitation of Coldest Quarter; ALT: Altitude. The symbol '\*\*' indicates a significant correlation at the level of  $\alpha = 0.01$ .
